# Supplementary material
Source: PubMed Central journal article supplement (PMC7171936)

SUPPLEMENTARY DATA

Supplementary Figure 1. Flow diagram of participant pathways.

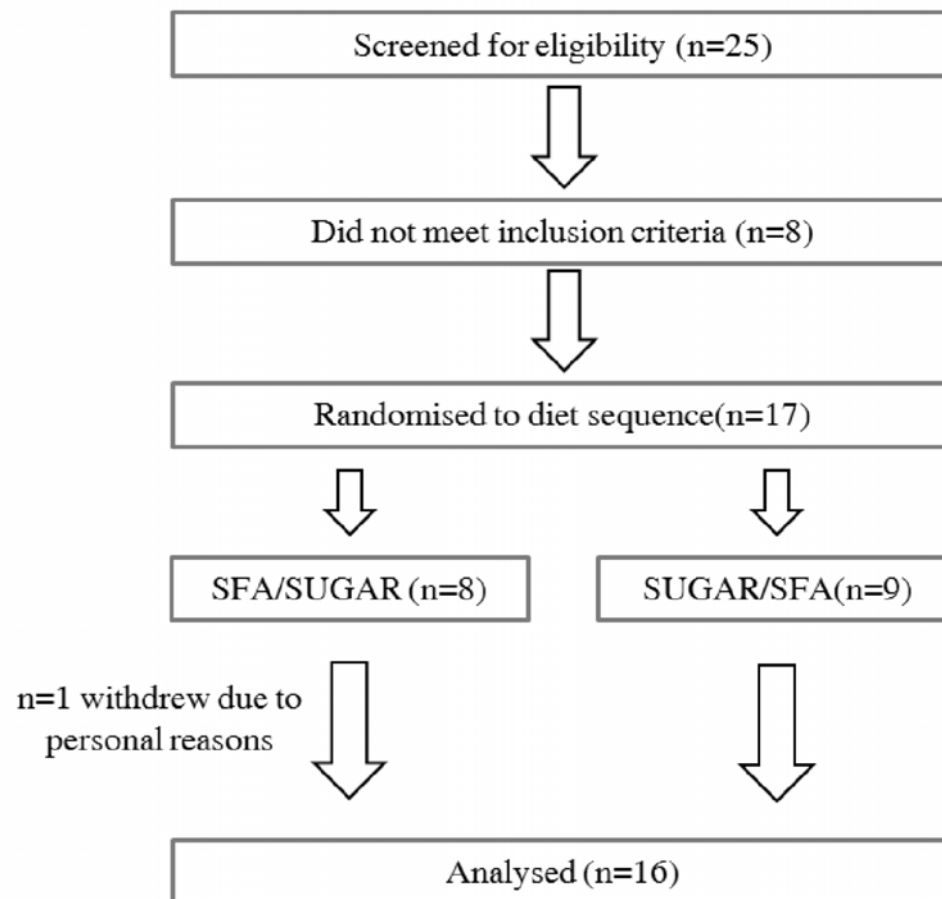

SUPPLEMENTARY DATA

Supplementary Table 1. Self-reported dietary intakes during the interventions.

|                             | Pre-SFA |      | SFA      |      | Pre-SUGAR |      | SUGAR                |        |
|-----------------------------|---------|------|----------|------|-----------|------|----------------------|--------|
|                             | Grams   | %TE  | Grams    | %TE  | Grams     | %TE  | Grams                | %TE    |
| <b>Carbohydrates</b>        | 249±22  | 46±2 | 239±17   | 35±1 | 246±18    | 46±2 | 374±18*              | 62±2*  |
| <b>Free sugars</b>          | 54±10   | 9±1  | 44±5     | 6±1  | 44±7      | 7±1  | 133±11*              | 23±23* |
| <b>Protein</b>              | 90±4    | 17±1 | 94±3     | 14±1 | 90±7      | 17±1 | 86±5                 | 15±1   |
| <b>Fat</b>                  | 83±4    | 34±1 | 140±7    | 46±1 | 90±7      | 35±2 | 52±5*                | 19±2*  |
| <b>SFA</b>                  | 32±3    | 13±1 | 62±4     | 21±1 | 35±4      | 13±1 | 17±2*                | 6±1*   |
| <b>MUFA</b>                 | 28±2    | 11±2 | 45±3     | 15±2 | 32±2      | 12±1 | 18±2*                | 7±1*   |
| <b>PUFA</b>                 | 12±1    | 5±1  | 17±2     | 6±1  | 13±1      | 5±1  | 9±1*                 | 3±1*   |
| <b>Alcohol</b>              | 15±3    | 5±1  | 18±4     | 5±1  | 17±6      | 5±2  | 13±4                 | 4±1    |
| <b>Energy intake (kcal)</b> | 2221±95 |      | 2697±126 |      | 2297±125  |      | 2405±88 <sup>†</sup> |        |

Data are presented as means ± SEM. n=15 SFA and n=13 SUGAR. \*  $p < 0.05$  SFA vs SUGAR

SUPPLEMENTARY DATA

Supplementary Table 2. Fasting VLDL-TAG FA composition at the end of each dietary intervention phase.

| <b>FATTY ACID</b>           | <b>SFA</b> | <b>SUGAR</b> |
|-----------------------------|------------|--------------|
|                             | Mol%       | Mol%         |
| <b>14:0</b>                 | 1.8±0.3    | 1.8±0.2      |
| <b>15:0</b>                 | 0.5±0.1    | 0.3±0.1*     |
| <b>16:0</b>                 | 27.5±0.6   | 26.8±1.0     |
| <b>16:1<math>n</math>-7</b> | 3.4±0.2    | 4.0±0.3      |
| <b>17:0</b>                 | 1.1±0.3    | 0.7±0.2      |
| <b>18:0</b>                 | 4.5±0.3    | 3.7±0.2      |
| <b>18:1<math>n</math>-9</b> | 45.8±1.5   | 46.8±1.1     |
| <b>18:1<math>n</math>-7</b> | 3.1±0.2    | 3.2±0.1      |
| <b>18:2<math>n</math>-6</b> | 11.6±1.4   | 11.8±1.0     |

Data are presented as means ± SEM. n = 12. \* p<0.05 SFA vs SUGAR.

## SUPPLEMENTARY DATA

Supplementary Figure 2. Relative difference in the plasma lipidomics profile between the SFA and sugar supplemented group (n=16). 337 identified lipid species passed the quality criteria. The volcano plot shows the relative changes to baseline between the SFA and the sugar group. The FDR corrected p-value was  $p = -\log(3.8)$  (dotted line). None of the identified lipid species reached significance in this comparison.

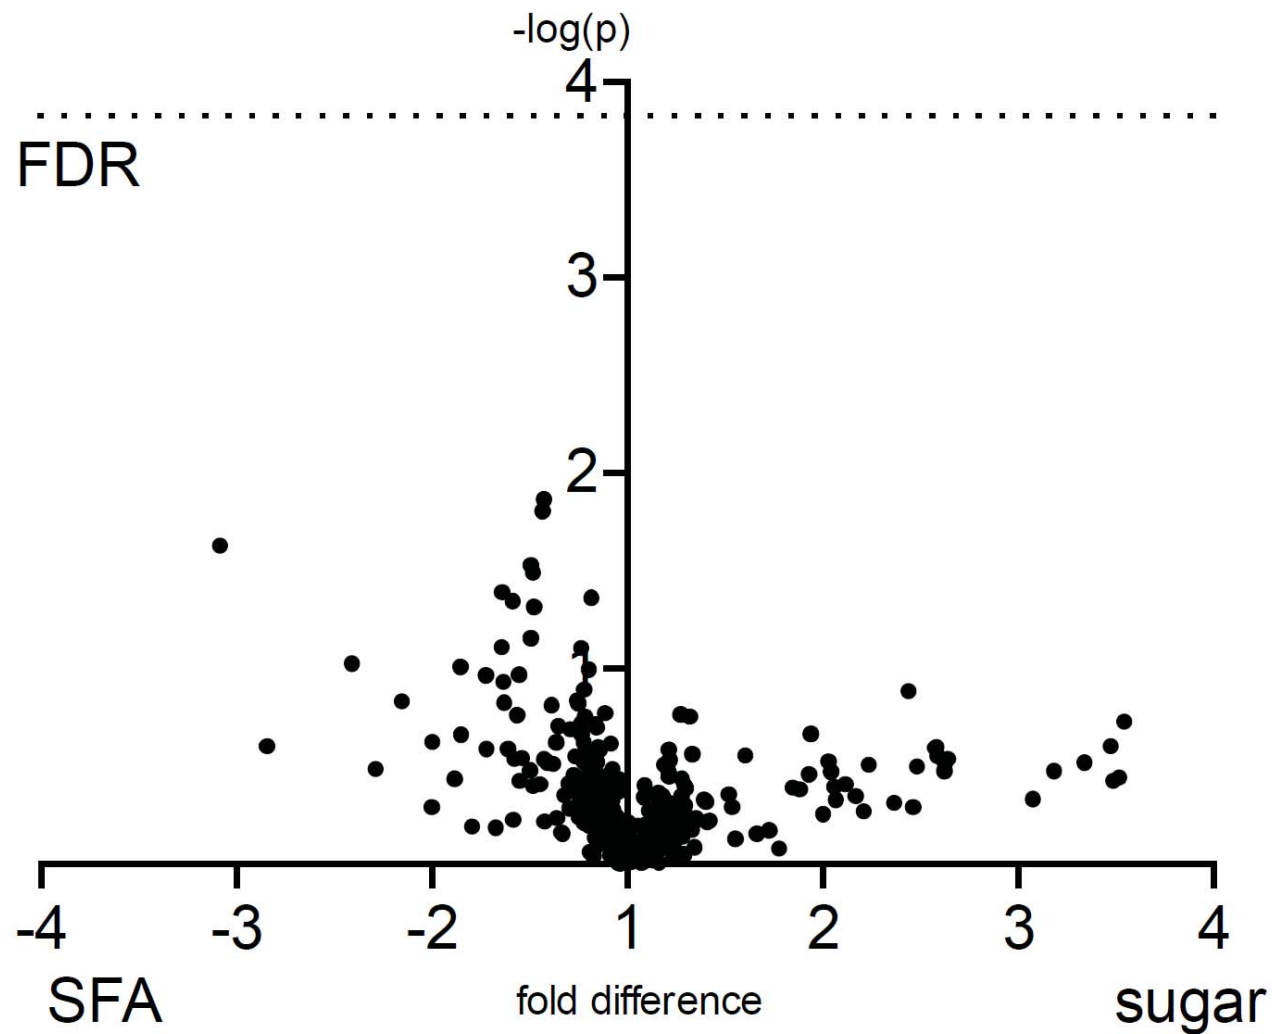

SUPPLEMENTARY DATA

Supplementary Figure 3. Differences in plasma acyl carnitines between pre-diet, sugar and SFA group. Ac carnitines were similarly lower in both groups compared to controls. No significant differences were seen between the sugar and the SFA group (n=16). \*\*\* p<0.001

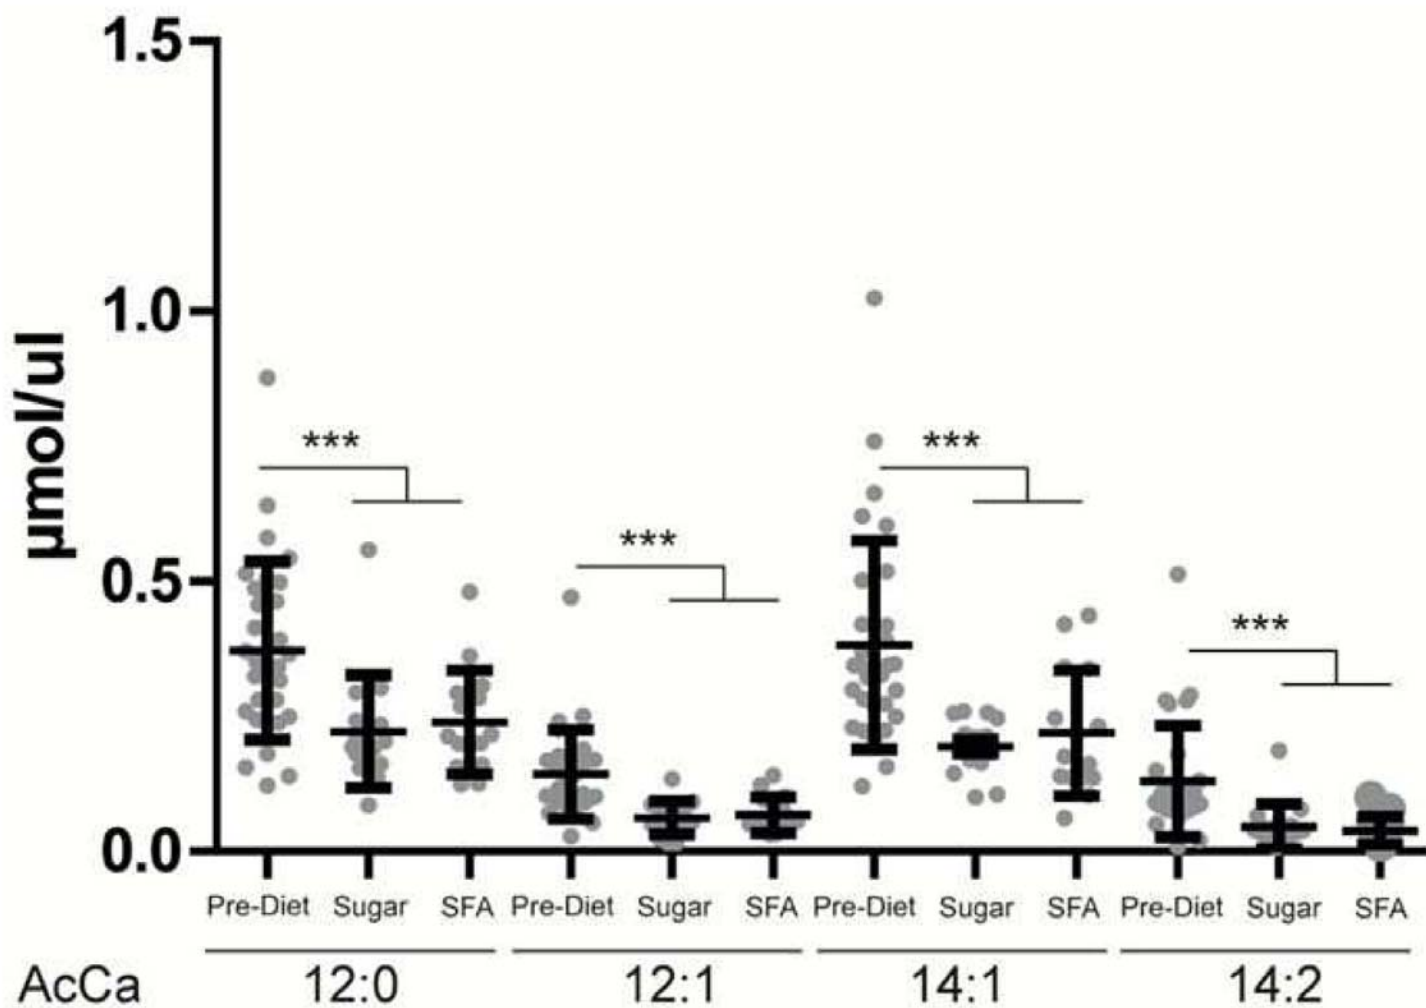

SUPPLEMENTARY DATA

Supplementary Figure 4. Linear regression model to determine the relationship between change in body weight (%) and change in IHTAG (%) in response to a saturated fat (SFA) enriched diet. n=16

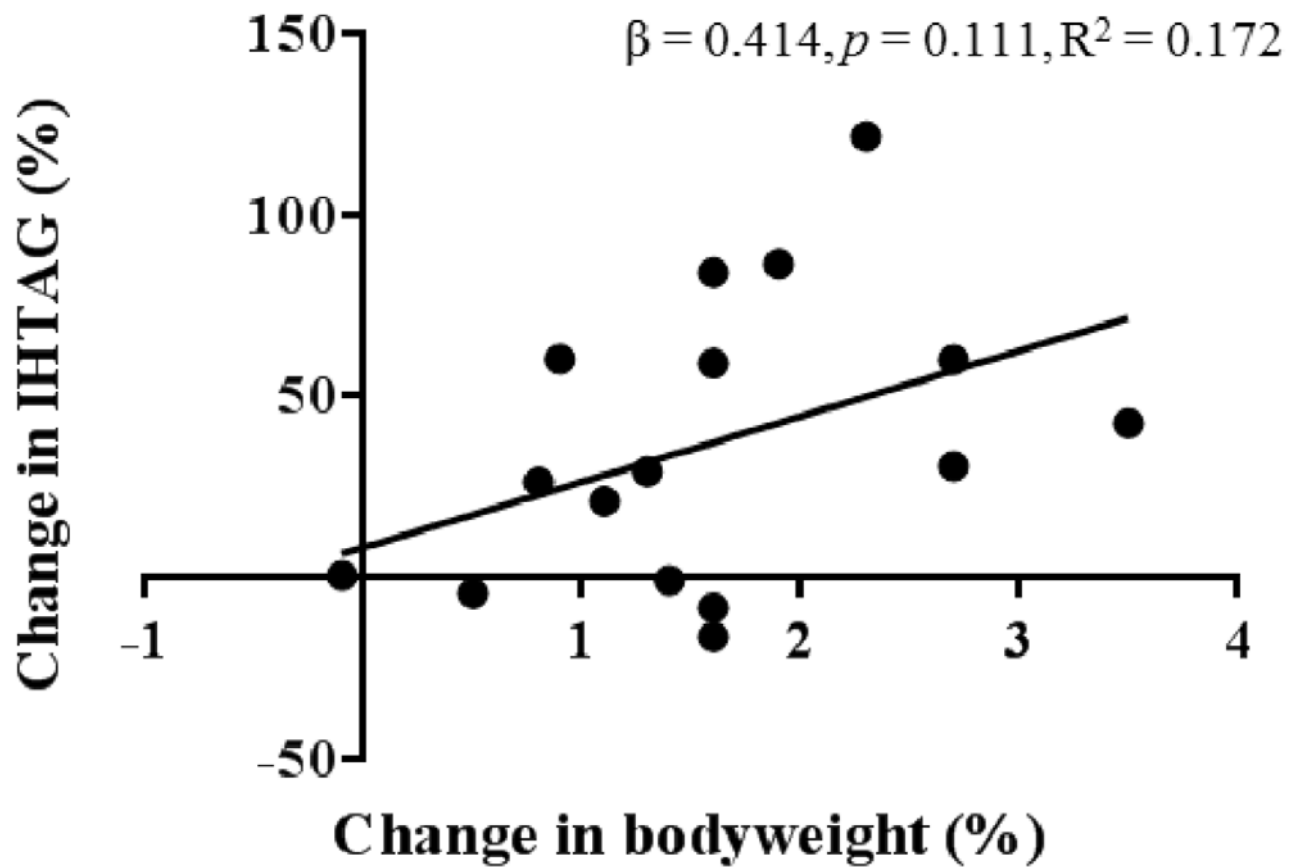

SUPPLEMENTARY DATA

Supplementary Figure 5. Systemic concentrations of total (A), and specific bile acid species (B) after consumption of a saturated fat (SFA), or free-sugar (SUGAR) enriched diet for 4-weeks. Data are presented as means  $\pm$  SEM. n=15.

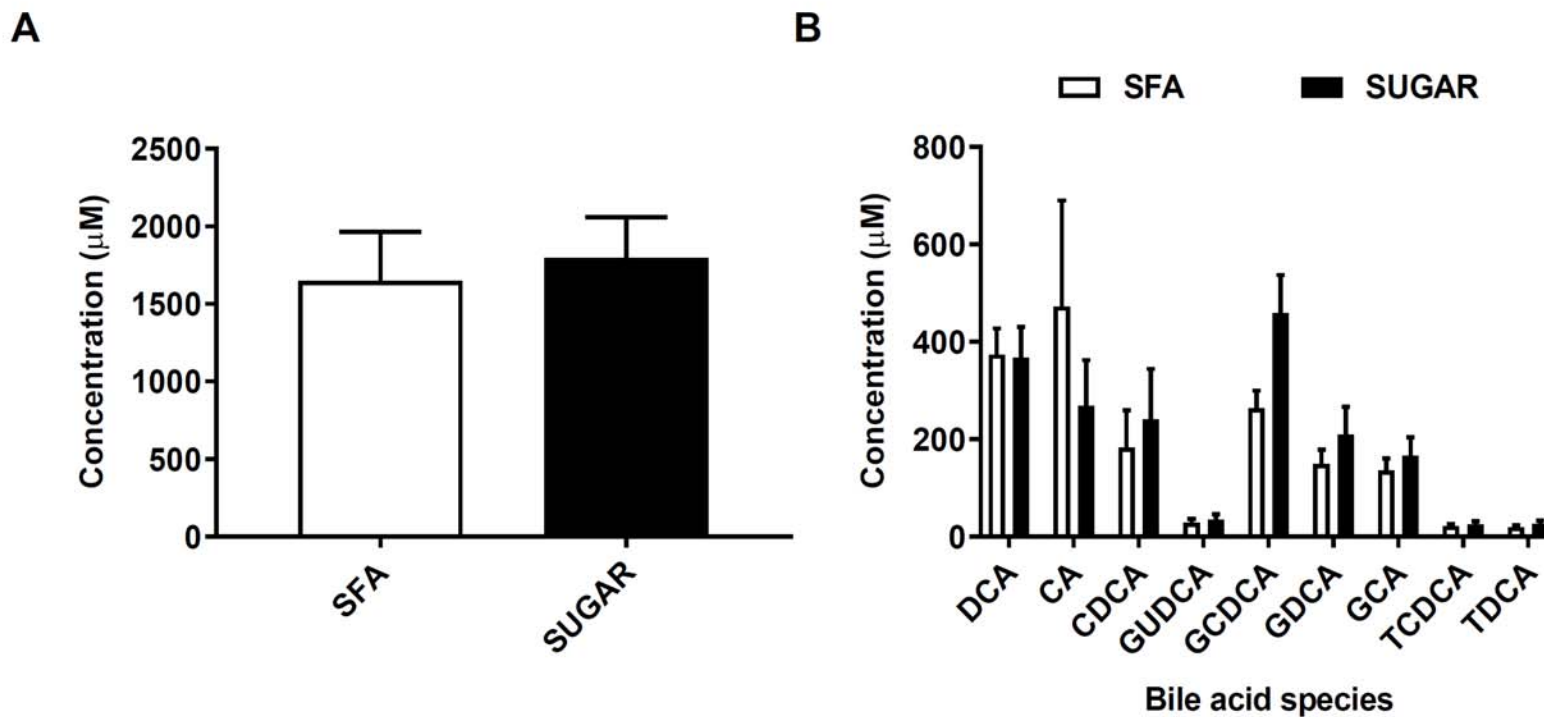

Supplement: DC192331SupplementaryData.pdf [file DC192331SupplementaryData.pdf]
